# Supplementary material for: A protein interaction mechanism for suppressing the mechanosensitive Piezo channels
Source: PubMed Central journal article supplement (PMC5702604; doi:10.1038/s41467-017-01712-z), 2017-11-27
Supplement: 41467_2017_1712_MOESM1_ESM.pdf [file 41467_2017_1712_MOESM1_ESM.pdf]

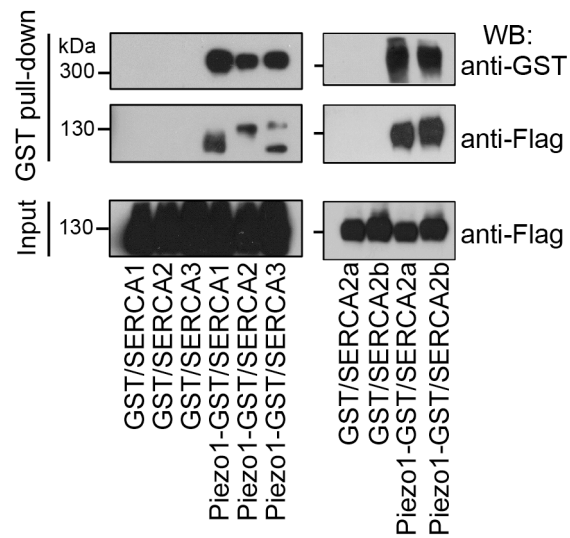

**Supplementary Figure 1 The three isoforms of SERCA (SERCA1, 2, 3) and both of the splicing variants of SERCA2 (SERCA2a, 2b) interact with Piezo1**

Cell lysates of HEK293T cells transfected with the indicated constructs were subjected to GST pull-down and subsequent western blotting with the anti-GST and anti-Flag antibodies (repeated 3 times).

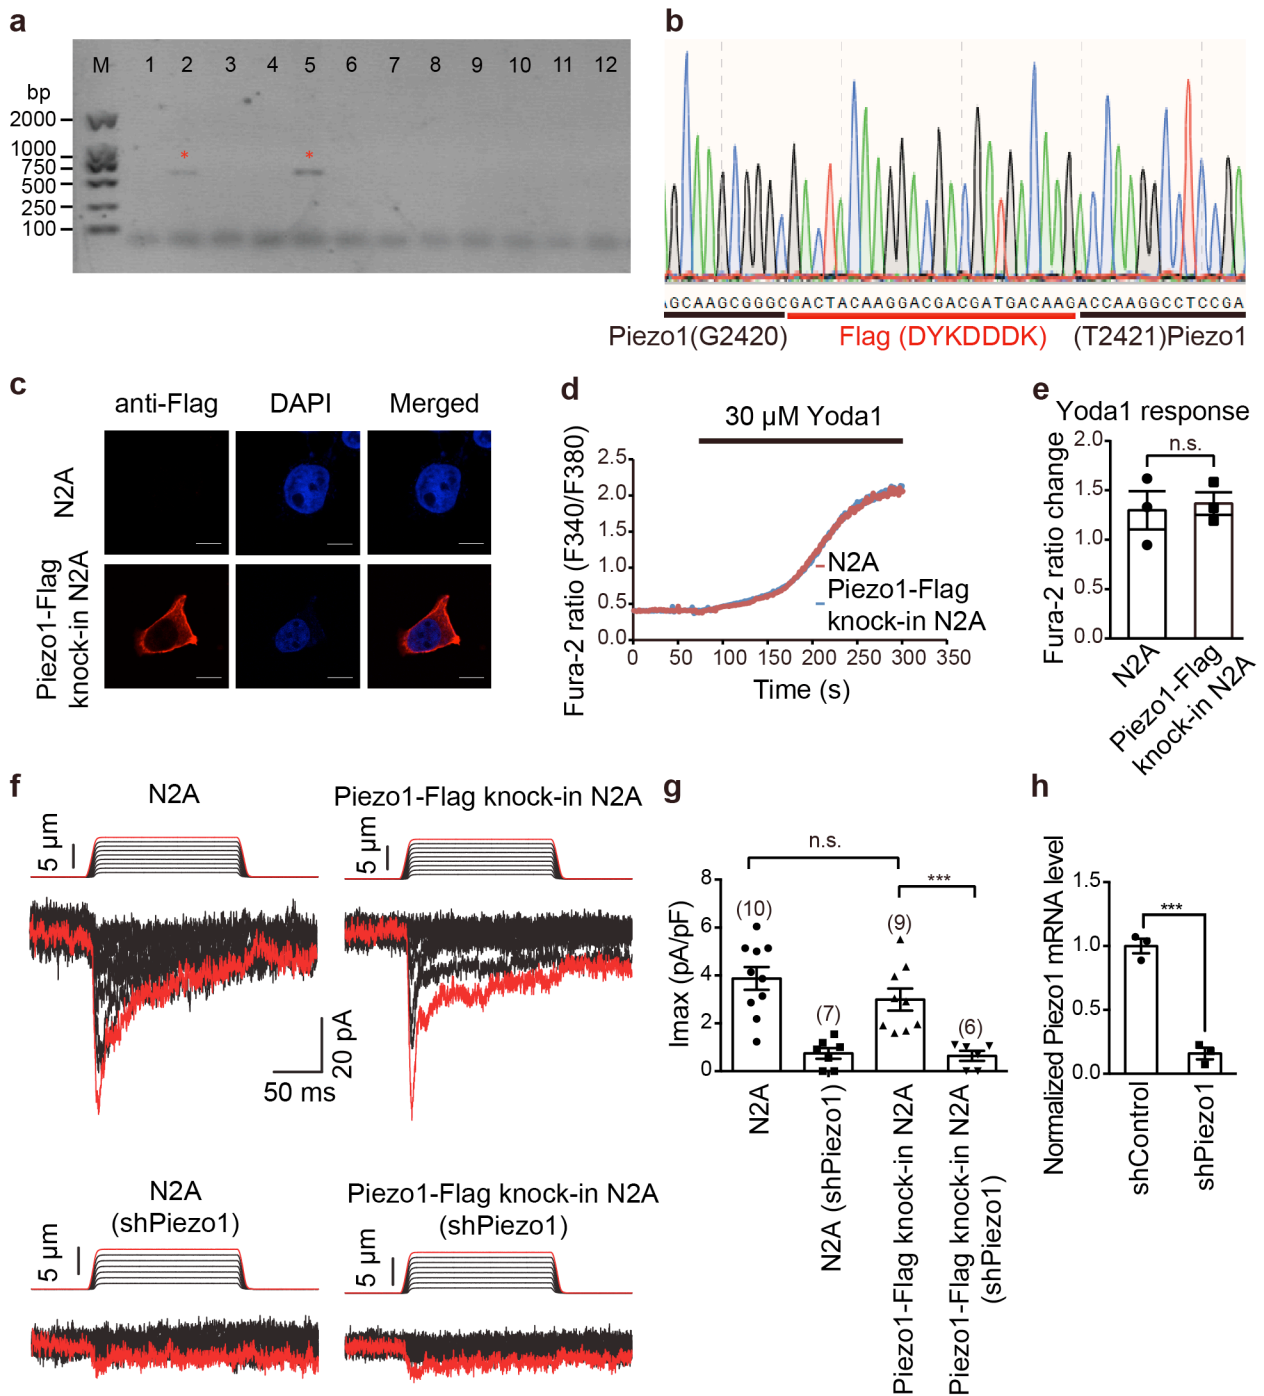

## Supplementary Figure 2 Generation and characterizations of the Piezo1-Flag knock-in N2A cells

**a**, PCR screening of N2A clones after CRISPR-Cas9 targeting. Clones #2 and #5 show the expected PCR product.

**b**, Sequencing verification of the correct insertion of the Flag-encoding sequence.

**c**, Immunofluorescent staining of wild-type or Piezo1-Flag knock-in N2A cells with the anti-Flag

antibody. Scale bar, 10  $\mu\text{m}$ .

**d**, Representative average traces of single-cell Fura-2  $\text{Ca}^{2+}$  imaging of the indicated cells in response to the Piezo1 chemical activator Yoda1.

**e**, Scatter plots of the Yoda1-induced Fura-2 ratio amplitude changes of the indicated cells. Unpaired student's t-test.

**f**, Representative traces of poking-induced inward currents recorded at -60 mV in wild type N2A or Piezo1-Flag knock-in N2A cells with or without knocking down Piezo1 with the shRNA against Piezo1 (shPiezo1).

**g**, Scatter plots of poking-induced maximal currents of the indicated conditions. One-way ANOVA with multiple comparison test.

**h**, Quantitative Real-Time PCR analysis of Piezo1 mRNA in N2A cells for validating the knockdown efficiency of Piezo1 shRNA. Glyceraldehyde-3-phosphate dehydrogenase (GAPDH) was used as the reference gene by means of the  $2^{-\Delta\Delta\text{CT}}$  method. Unpaired student's t-test. \*\*\*  $p < 0.001$ .

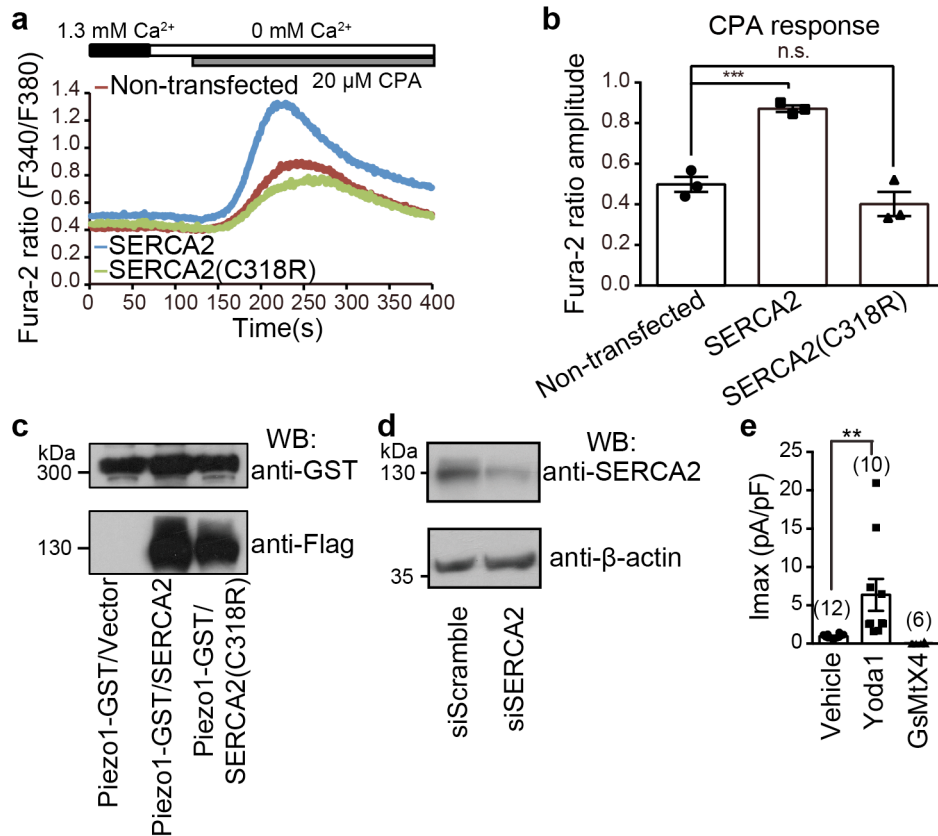

**Supplementary Figure 3 Characterizations of the SERCA2 (C318) mutant that lacks Ca<sup>2+</sup> pumping activity, the knockdown efficiency of SERCA2 in N2A, and pharmacological responses of poking-induced currents in HUVEC.**

**a**, Representative average traces of single-cell Fura-2 Ca<sup>2+</sup> imaging of HEK293T cells transfected with the indicated constructs in response to cyclopiazonic acid (CPA), an inhibitor of SERCA2.

**b**, Scatter plots of the CPA-induced Fura-2 ratio amplitude changes of the indicated cells. One-way ANOVA with Turkey's multiple comparison test.

**c**, Western blotting detection of the expression of Piezo1, SERCA2 and SERCA2-C318R in HEK293T cells co-transfected Piezo1-GST with vector, Flag-SERCA2 or Flag-SERCA2-C318R.

**d**, Western blotting shows the knockdown efficiency of SERCA2 in N2A cells (repeated 3 times).

**e**, Scatter plots of the poking-induced maximal currents from HUVEC treated with Vehicle, 30 μM Yoda1 and 4 μM GsMTX4. One-way ANOVA with Turkey's multiple comparison test. \*\* p < 0.01,

\*\*\* p < 0.001.

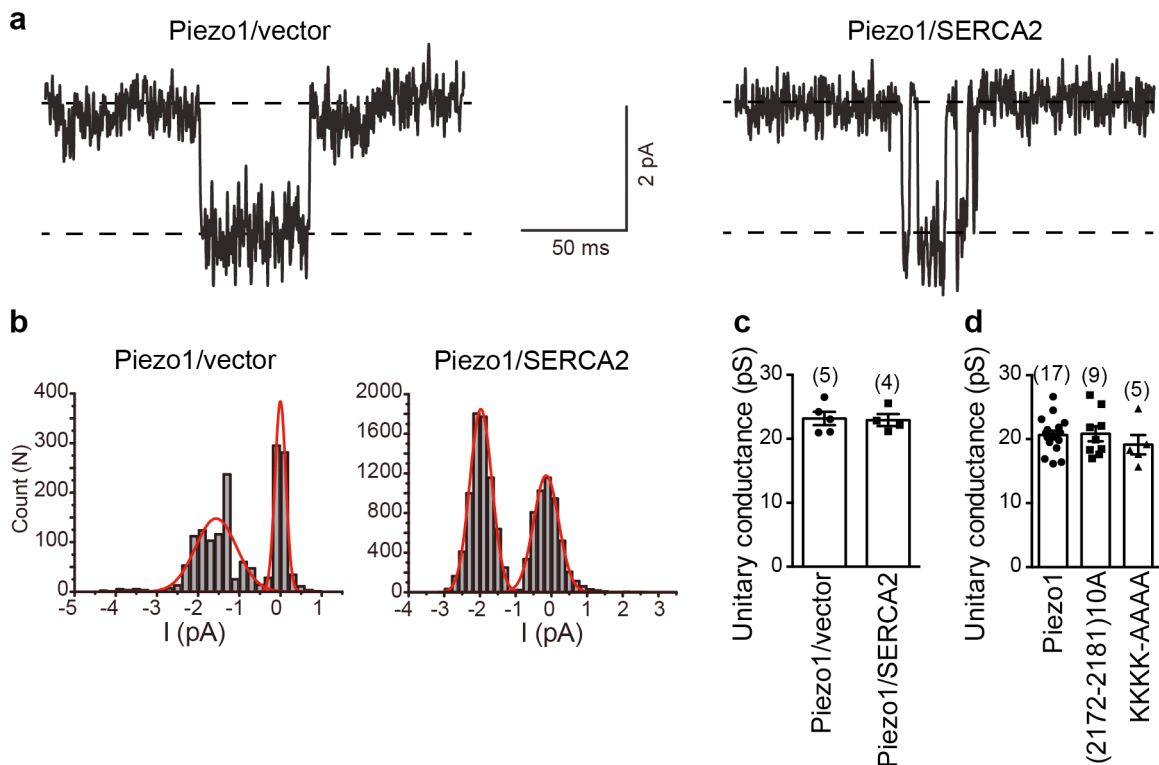

**Supplementary Figure 4 SERCA2 co-expression or mutating the linker region does not affect the unitary conductance of Piezo1.**

**a**, Representative traces showing single-channel activities of cells with the indicated transfections in the absence of mechanical stimulation.

**b**, All-event current amplitude histograms of the recordings. Current amplitudes recorded at -80 mV were calculated from Gaussian fits to the current amplitude histograms. 150 to 1400 or 40 to 1800 events were analyzed for individual Piezo1/Vector- ( 5 cells) or Piezo1/SERCA2-transfected (4 cells) cells, respectively.

**c** and **d**, Scatter plots of the unitary conductance of the indicated transfections.

The analyzed cell number is labeled above the bar.

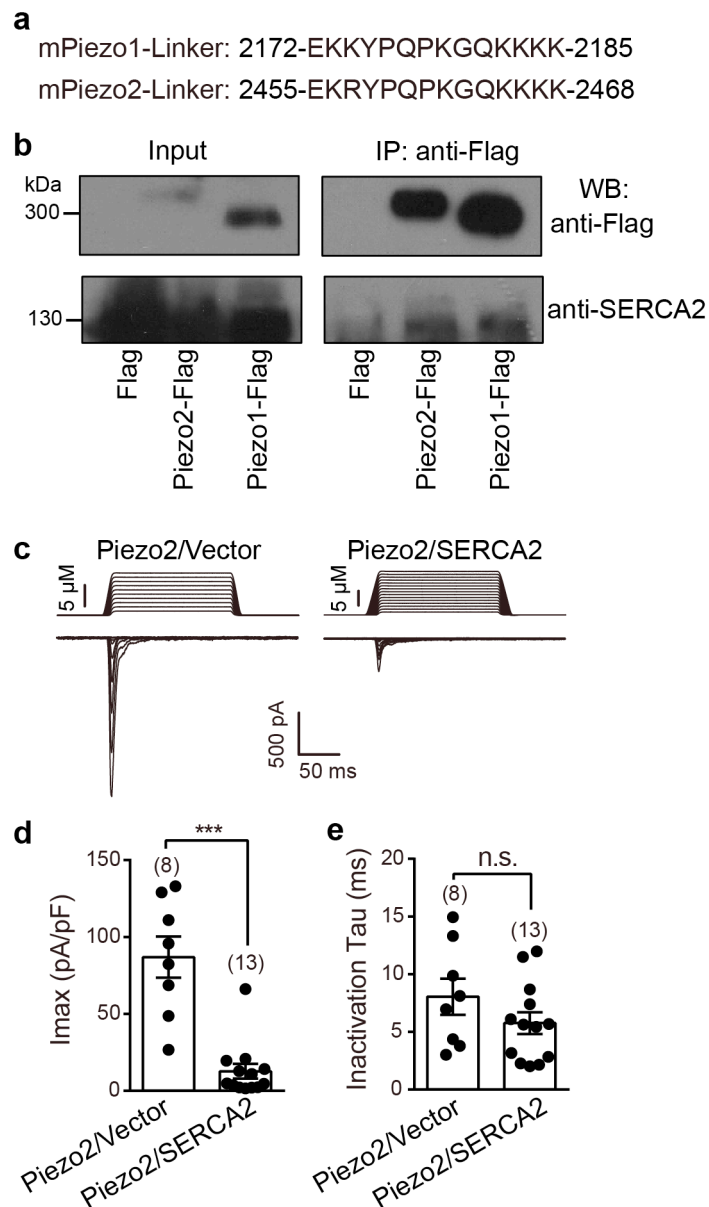

**Supplementary Figure 5 SERCA2 interacts with Piezo2 and suppresses its poking-evoked currents.**

**a**, Sequence conservation of the linker region between mPiezo1 and mPiezo2.

**b**, Western blots showing co-precipitation of SERCA2 with either Piezo1 or Piezo2.

**c**, Representative traces of poking-induced currents recorded at -60 mV in HEK293T cells with the indicated transfections.

**d** and **e**, Scatter plots of the maximal poking-induced currents (**d**) or inactivation tau (**e**) of the indicated transfections. Unpaired student's t-test. \*\*\*  $p < 0.001$

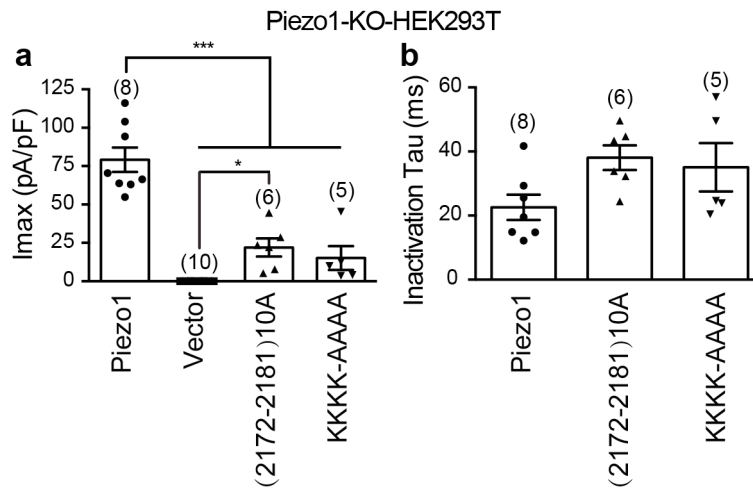

**Supplementary Figure 6 Piezo1-KO-HEK293T cells transfected with the Piezo1-(2172-2181)10A and Piezo1-KKKK-AAAA show reduced poking-induced currents compared to Piezo1-transfected cells, similar to that observed in HEK293T cells shown in Figure 5d - f.**

**a** and **b**, Scatter plots of the maximal poking-induced currents (**a**) or inactivation tau (**b**) recorded from the Piezo1-KO-HEK293T cells transfected with the indicated constructs. One-way ANOVA with multiple comparison test. \*\*\*  $p < 0.001$ , \*  $p < 0.05$ .

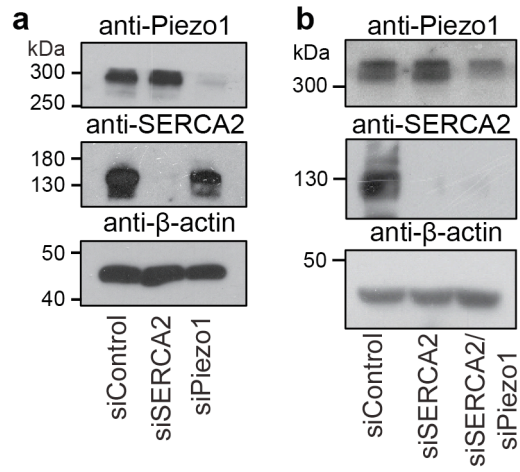

**Supplementary Figure 7 Knock-down efficiency of SERCA2 and Piezo1 in HUVEC.**

**a** and **b**, Western blotting shows the knockdown efficiency of SERCA2 and Piezo1 (repeated 3 times).



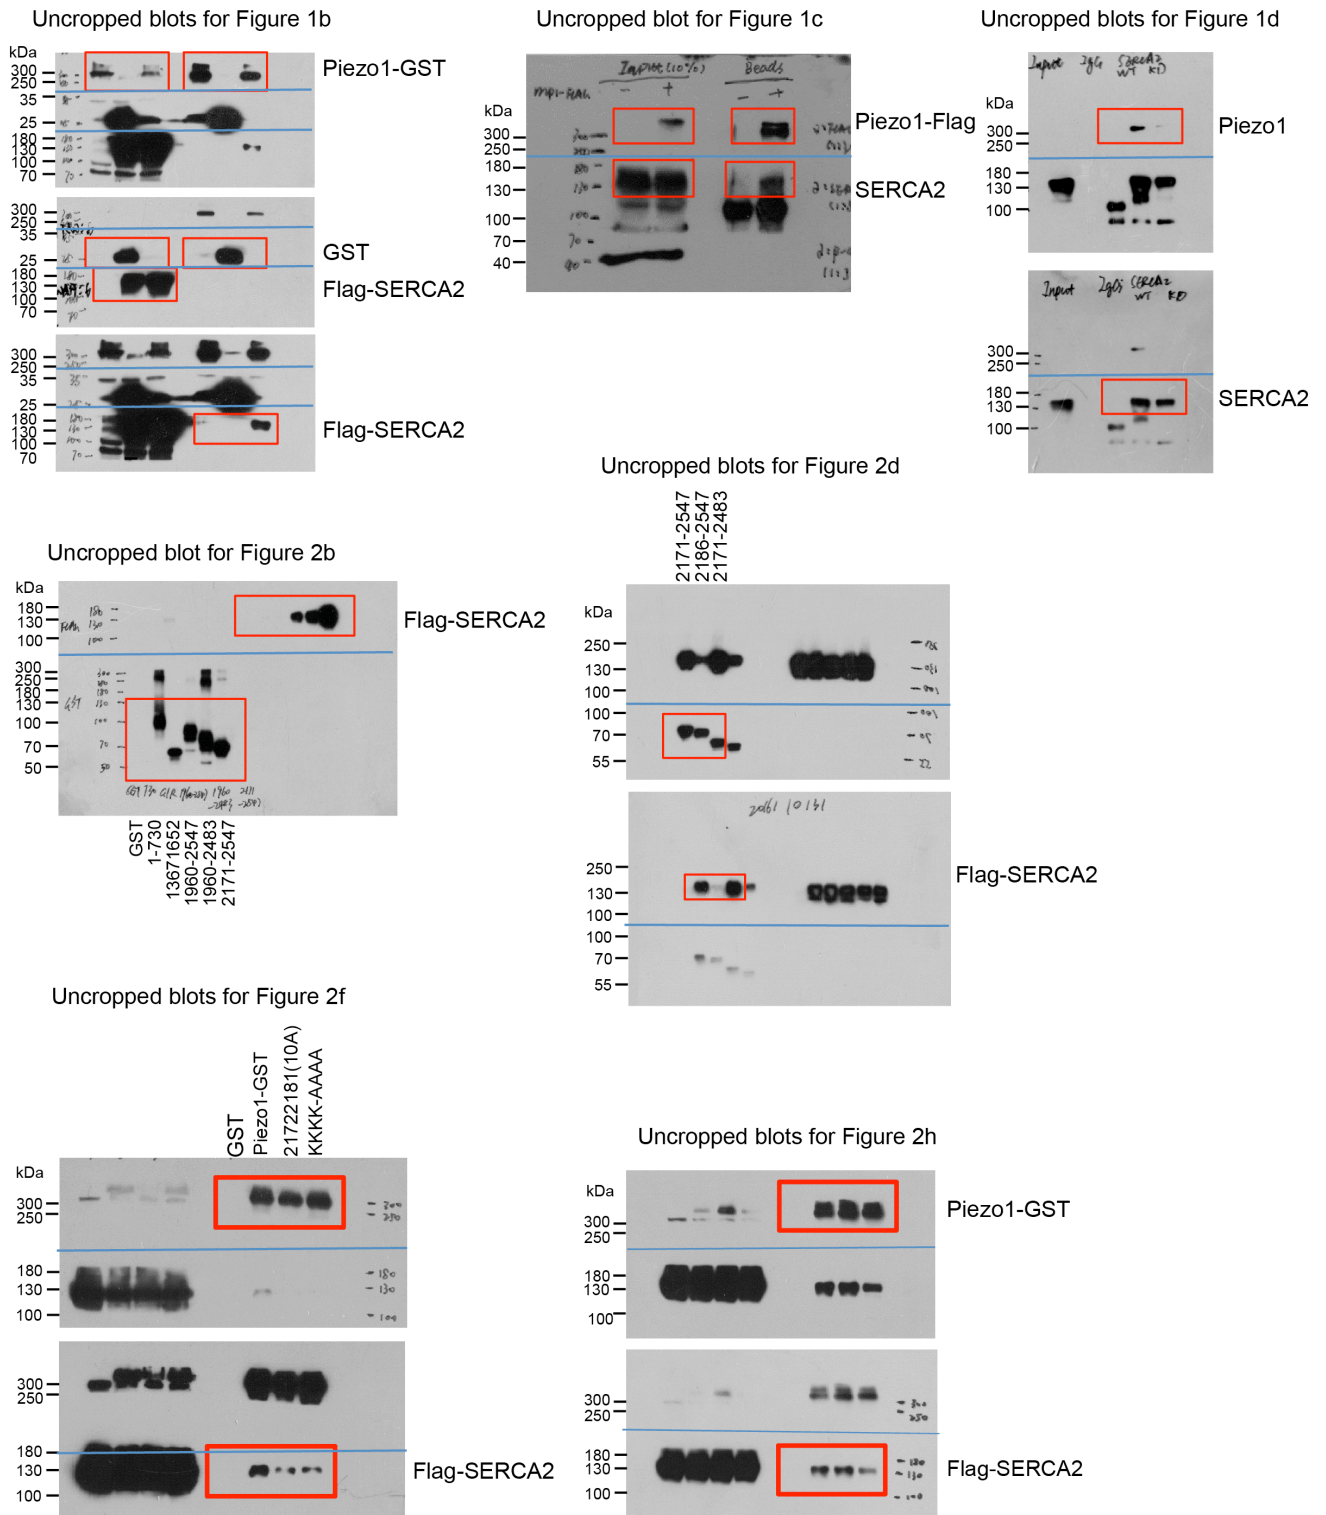

### Supplementary Figure 8 Uncropped western blots

Red boxes in the uncropped blots indicate the cropped regions shown in the corresponding figures.

**Supplementary Fig. 8 (continued)**

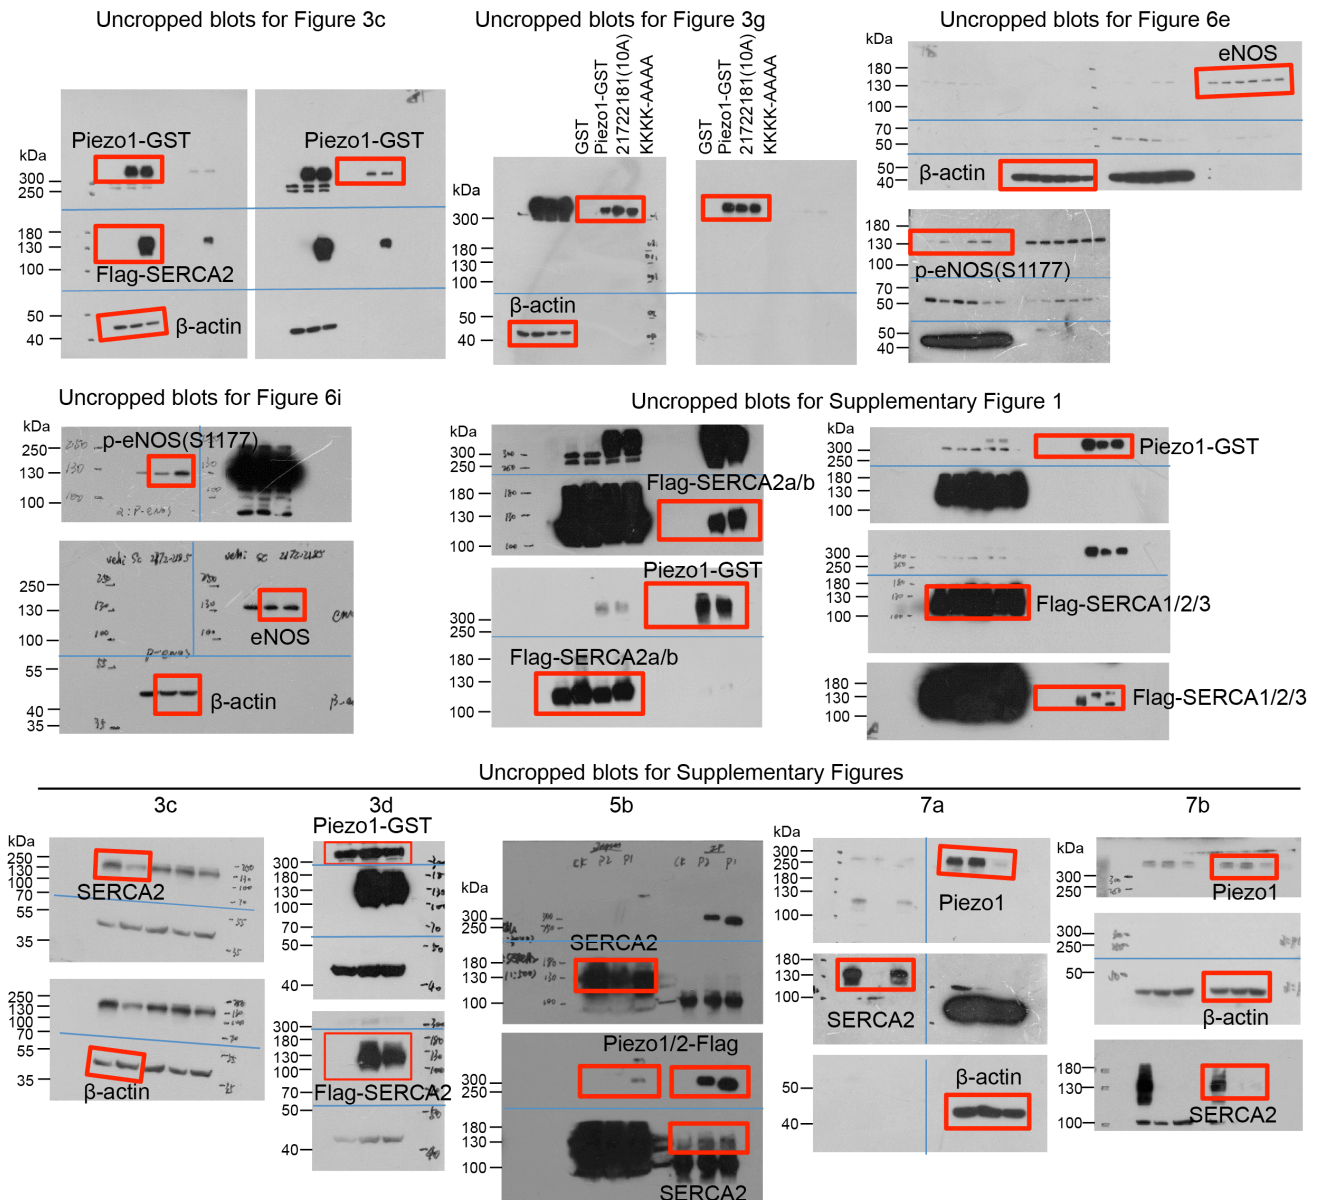

## Supplementary Table 1 Peptides identified by mass spectrometry that correspond to SERCA2

| Sequence        | # PSMs | # Proteins | # Protein Groups | Protein Group Accessions | Modifications        | ΔCn | q-Value | PEP       | XCorr | Charge | MH+ [Da]  | ΔM [ppm] | RT [min] |
|-----------------|--------|------------|------------------|--------------------------|----------------------|-----|---------|-----------|-------|--------|-----------|----------|----------|
| IRDEMVAEQER     | 2      | 5          | 1                | J3KMM5(SERCA2)           |                      | 0   | 0       | 0.002756  | 3.49  | 2      | 1476.7158 | 3.08     | 20.22    |
| VGEATETALTeLVEK | 3      | 14         | 2                | P13585(SERCA1);J3KMM5    | C11(Carbamidomethyl) | 0   | 0       | 3.39E-06  | 3.43  | 2      | 1620.814  | -0.61    | 31.6     |
| NMLFSGTNIAAGK   | 1      | 6          | 1                | J3KMM5                   |                      | 0   | 0       | 0.0002192 | 3.28  | 2      | 1323.6719 | -0.53    | 29.61    |
| MNVFDTELKGLSK   | 1      | 5          | 1                | J3KMM5                   |                      | 0   | 0       | 0.0002284 | 3.16  | 2      | 1481.767  | 0.06     | 32.5     |
| VDQSILTGESVSVIK | 2      | 7          | 2                | P13585;J3KMM5            |                      | 0   | 0       | 1.81E-06  | 3.15  | 2      | 1574.8641 | 0.26     | 29.82    |
| NmLFSGTNIAAGK   | 1      | 6          | 1                | J3KMM5                   | M2(Oxidation)        | 0   | 0       | 0.00785   | 2.68  | 2      | 1339.6672 | -0.28    | 26.69    |
| SMSVYcTPNKPSR   | 1      | 5          | 1                | J3KMM5                   | C6(Carbamidomethyl)  | 0   | 0       | 0.005171  | 2.55  | 2      | 1526.7103 | 0.78     | 20.16    |
| TGTLTTNQMSVcR   | 1      | 13         | 1                | J3KMM5                   | C12(Carbamidomethyl) | 0   | 0       | 0.000374  | 2.41  | 2      | 1468.6889 | 0.38     | 21.93    |
| IGIFGQDEDVTSK   | 1      | 4          | 1                | J3KMM5                   |                      | 0   | 0       | 0.0001098 | 2.28  | 2      | 1408.6957 | 0.15     | 29.08    |
| EFDELSPAQR      | 2      | 4          | 1                | J3KMM5                   |                      | 0   | 0       | 0.007019  | 2.16  | 2      | 1278.5964 | 0.18     | 23.77    |
| ANAeNSVIK       | 1      | 6          | 2                | P13585;J3KMM5            | C4(Carbamidomethyl)  | 0   | 0       | 0.0009914 | 2.12  | 2      | 976.48802 | -0.06    | 17.03    |
| GAPEGVIDR       | 2      | 7          | 2                | P13585;J3KMM5            |                      | 0   | 0.003   | 0.01901   | 2.01  | 2      | 913.4735  | -0.37    | 19.15    |
| EWGSGSDTLR      | 1      | 5          | 1                | J3KMM5                   |                      | 0   | 0.003   | 0.02619   | 1.91  | 2      | 1107.5069 | 0.27     | 22.9     |
| SEIGIAMSGTAVAK  | 1      | 4          | 1                | J3KMM5                   |                      | 0   | 0.005   | 0.03448   | 2.51  | 2      | 1391.7204 | 0.29     | 26.21    |
| RIGIFGQDEDVTSK  | 1      | 4          | 1                | J3KMM5                   |                      | 0   | 0.007   | 0.03952   | 3.03  | 2      | 1564.7956 | -0.68    | 27.44    |
| LDEFGEQLSK      | 1      | 7          | 2                | P13585;J3KMM5            |                      | 0   | 0.007   | 0.05005   | 2.17  | 2      | 1165.5727 | -0.79    | 25.6     |

**Supplementary Table 2 Primer, sgRNA, shRNA and siRNA sequences**

| Name                   | Sequence                                                                                |
|------------------------|-----------------------------------------------------------------------------------------|
| mPiezo1-F              | GCCCTCTAGACTCGAGCGGCCGCGCCACCATGGA                                                      |
| mPiezo1-SbfI-F         | CCTGAAAGCCACAGCCCTGCAGG                                                                 |
| mPiezo1-R              | AACAGAACTTCCAGTGGCGCGCCAAGCTTCTTCT                                                      |
| mPiezo1-Flag-R         | AAGGTTCCGCGGCTACTTATCGTCGTCATCCTTGTAAATCTGG<br>CGCGCCAAGC                               |
| mPiezo1-730-R          | AACAGAACTTCCAGTGGCGCGCCAAGCTTCCATCGAGGGTGGCGGGTG                                        |
| mPiezo1-1367-F         | GCCCTCTAGACTCGAGCGGCCGCGCCACCATG                                                        |
| mPiezo1-1652-R         | AACAGAACTTCCAGTGGCGCGCCAAGCTTCC                                                         |
| mPiezo1-1960-F         | CGTTTAAACGGGCCCTCTAGAGCCACCATGCGTTTCTT                                                  |
| mPiezo1-2171-F         | CGTTTAAACGGGCCCTCTAGAGCCACCATGACAGAGAAGAAATACCCC                                        |
| mPiezo1-2186-F         | CGTTTAAACGGGCCCTCTAGAGCCACCATGATTGTCAAGTATGGTATG                                        |
| mPiezo1-2483-R         | AACAGAACTTCCAGTGGCGCGCCAAGCTTGCCCCGCACAACTTGCC                                          |
| mPiezo1-2172-2181A-F   | AGCCGCTGCGGCAGCCGCAGCGGCCAAGAAGAAGAAAATTGTCA                                            |
| mPiezo1-2172-2181A-R   | CTGCGGCTGCCGCAGCGGCTGCAGCTGTCTCTCGGCTGCACTTG                                            |
| mPiezo1-KKKKAAAA-F     | GCAGGCTGCCGCAGCGATTGTCAAGTATGGTATGGG                                                    |
| mPiezo1-KKKKAAAA-R     | CAATCGCTGCGGCAGCCTGCCCTTGGGCTGGGGGT                                                     |
| mPiezo1-mRuby-F        | AGGGAGAAGAAGCTTGGCGCGCCAATGGTGTCTAAGGGCGAA                                              |
| mPiezo1-mRuby-R        | TTTAAACTTAAGCTTGGCCGGCCTCACTTGTTCATCGTCGTCCTTGT<br>GTCTCCATCGAGTGATCCCTTGTACAGCTCGTCCAT |
| mPiezo2-6684KasI-F     | TGTGAGGCGCCGCCCTCT                                                                      |
| mPiezo2-Flag-R         | GAT GCGGCCGCTACTTATCGTCGTCATCCTTGTAAATC<br>TGGCGCGCCTCCG                                |
| Flag-SERCA2-F          | AGCTCCACCGCGGTGGCGGCCGCCACCA                                                            |
| Flag-SERCA2-R          | GGGCCCCCCTCGAGGTCGACTCAA                                                                |
| Flag-SERCA2-IRES-GFP-F | GCCCTCTAGACTCGAGCGGCCGCCACCATGGATTA                                                     |
| Flag-SERCA2-IRES-GFP-R | GGGCGGATCCCGGGCCCCGCGGTCAAGACCAGAACATATCGC                                              |
| SERCA2-C318R-F         | GCAGTCATCACCACCCGCTGGCTCTTGAA                                                           |
| SERCA2-C318R-R         | AGGCGGGTGGTGATGACTGCAGGCA                                                               |
| SpeI-SERCA2-F          | GGTGAATTCCTCGAGACTAGTGCCACCATGGAGAACGCGCACAC                                            |
| NotI-SERCA2-R          | GAGAGGGGCGGATCCGCGGCCGCTCAAGACCAGAACATATC                                               |
| Flag-SERCA2a-R         | GGGCCCCCCTCGAGGTCGACTTACTCCAGTATTGCA<br>GGTTCCAGGTAGTTGCG                               |
| Flag-SERCA1-F          | GATAAGAGCCCGGGCGGATCCATGGAGGCCGCGCACTCCAAGT                                             |
| Flag-SERCA1-R          | GGGCCCCCCTCGAGGTCGACTTATCCCTCCAGATAGTTCCGA                                              |
| Flag-SERCA3-F          | GATAAGAGCCCGGGCGGATCCATGGAGGAGGCGCACCTGCTCT                                             |
| Flag-SERCA3-R          | GGGCCCCCCTCGAGGTCGACTCAGTCTGAGGGCCACACTGGA                                              |
| Flag-pCMV-Tag2b-F      | CCGGGCGGATCCTGAGAATTCCG                                                                 |
| Flag-pCMV-Tag2b-R      | TCGACGAATTCTCAGGATCCGC                                                                  |
| Flag-pcDNA3.1(-)-F     | GGCCGCACTCGAG ATGGACTACAAAGACGATGATGACAAGTAG<br>CCGC                                    |
| Flag-pcDNA3.1(-)-R     | GGCTACTTGTTCATCATCGTCTTTGTAGTCCATCTCGAGT GC                                             |
| IRES-GFP-F             | GACGACGATAAGTAGGCGGCCGCTTAACTGCAGTCGA                                                   |
| IRES-GFP-R             | GCCCTCTAGACTCGAGCGGCCGCCGGTTTAACTTAA                                                    |
| GST-F                  | CTAGACTCGAGCGGCCGCGCCACCATGAAGCTTGG                                                     |
| GST-R                  | CGCGCCAAGCTTCATGGTGGCGCGGCCGCTCGAGT                                                     |

**Supplementary Table 2 (continued)**

| Name                      | Sequence                                                            |
|---------------------------|---------------------------------------------------------------------|
| mPiezo1 shRNA-F           | AACTCGGCGCTTGCTAGAACTTCATTCAAGAGATGAAGTTCT<br>AGCAAGCGCCGATTTTC     |
| mPiezo1 shRNA-R           | TCGAGAAAATCGGCGCTTGCTAGAACTTCATCTCTTGAATGAA<br>GTTCTAGCAAGCGCCGAGTT |
| mPiezo1-qPCR-F            | TGCCATGCTCCTCTATCTGCT                                               |
| mPiezo1-qPCR-R            | GGCGCACACATAGATCCAGTA                                               |
| mGAPDH-qPCR-F             | GCACCACCAACTGCTTAG                                                  |
| mGAPDH-qPCR-R             | GGATGCAGGGATGATGTTC                                                 |
| mPiezo1-Flag sgRNA-F      | CACCGTGGGGAGCAAGCGGGCACCA                                           |
| mPiezo1-Flag sgRNA-R      | AAACTGGTGCCCGCTTGCTCCCCAC                                           |
| mPiezo1-Flag donor1-F     | CGTTTAAACGGGCCCTCTAGACACACTGCCTAACACTGCCTGC                         |
| mPiezo1-Flag donor1-R     | CTTGTCATCGTCGTCTTGTAGTCGCCCGCTTGCTCCCCAGA                           |
| mPiezo1-Flag donor2-F     | ACAAGGACGACGATGACAAGACCAAGGCCTCCGACTTCCTC                           |
| mPiezo1-Flag donor2-R     | TAGTCCAGTGTGGTGAATTCAGGCAGCTCCTTCATTCCCG                            |
| mPiezo1 shRNA             | UCGGCGCUUGCUAGAACUUA                                                |
| Control (Scrambled) siRNA | UUCUCCGAACGUGUCACGU                                                 |
| hPiezo1 siRNA             | AGAAGAAGAUCGUCAAGUA                                                 |
| hSERCA2 siRNA mix pool    | AAGCAGGACAUCAAUGAGCAA                                               |
|                           | AAGGUGAUACUUGUCCCUUA                                                |
|                           | CAACUGGAGUUAACACCGAAA                                               |
|                           | CAGAAAGUCAAUUGUCGGUUA                                               |

**Supplementary Table 3 Sequence information for generating the Piezo1-Flag knock-in N2A**

| Name                                 | Sequence                                                                                                                                                                                                                                                                                                                                                                                                                                                                                                                                                                                                                                                                                                                                                                                                                                                                                                                                                                                                                                                                                                                                                                                                                  |
|--------------------------------------|---------------------------------------------------------------------------------------------------------------------------------------------------------------------------------------------------------------------------------------------------------------------------------------------------------------------------------------------------------------------------------------------------------------------------------------------------------------------------------------------------------------------------------------------------------------------------------------------------------------------------------------------------------------------------------------------------------------------------------------------------------------------------------------------------------------------------------------------------------------------------------------------------------------------------------------------------------------------------------------------------------------------------------------------------------------------------------------------------------------------------------------------------------------------------------------------------------------------------|
| mPiezo1 sgRNA                        | UGGGGAGCAAGCGGGCACCA                                                                                                                                                                                                                                                                                                                                                                                                                                                                                                                                                                                                                                                                                                                                                                                                                                                                                                                                                                                                                                                                                                                                                                                                      |
| Insert sequence of the donor plasmid | CACACTGCCTAACACTGCCTGCTCCCCAGGGACCTGGCCAAGGGTGGCACTGTG<br>GAGTATACTAATGAGAAGCACACCTTGGAGCTGGCCCCAACAGTACGGCACGA<br>AGGCAGCTGGCCCAACTGCTCGAGGGCAGACCTGACCAGTCAGTGTGAGTGGGG<br>GCCACTGTGGGGCATGTGGGCAGGAGGGCTAAGATGCCCTGACCTGAGCAGTC<br>AGTGTGAGTGGGGGCCACTGTGGGGCATGTGGGCAGGAGGGCTAAGATGCCCT<br>GACTTGCTGACTCCTCCCACAGGGTCATTCCCCATCTCTTCCCCAAGTACATTCGT<br>GCTCCAATGGGCCTGAAGCCAACCCTGTGAAGCAGCTGCAGCCAGGTCAGTGT<br>GGGAGCAGGGCGCAGGGATGTGGGCTAGGCCGGAAGTGTGGGTGCAGGGATGT<br>AGGGATGCGGGCTAGGCCGGGGGCCAGTGTAGCCCGACTCTAACTATCCCACTC<br>AACTCAGATGAGGAAGAGGACTACCTTGGTGTGCGCATCCAGCTGCGGAGGGAG<br>CAAGTGGGCACAGGGGCCTCTGGGGAGCAAGCGGGCGACTACAAGGACGACGA<br>TGACAAGACCAAGGCCTCCGACTTCCTCGAGTGGTGGGTTCATCGAGCTGCAGGA<br>CTGCAAGGCTGACTGCAACCTGCTGCCCATGGTCATCTTCAGTGACAAGGTCAGC<br>CCACCTAGCCTGGGCTTCTGGCCGGCTACGGGTGAGTACTGCAGAGGGATCTCC<br>GAGAGCCCCAAGGGTTCTGAGTGGTCCCGGCTCACATGCCCGCTCTCCCGACA<br>GGATTGTGGGGCTGTACGTCTCCATCGTGCTGGTGGTTGGCAAGTTTGTGCGGGG<br>CTTCTTCAGCGAGATCTCTCACTCCATCATGTTTCGAGGAACTGCCGTGTGTGGAC<br>CGCATCCTCAAGCTGTGCCAGGACATCTTCTTGGTGCGCGAGACCCGGGAGCTG<br>GAGCTGGAGGAGGAGCTATACGCCAAGCTCATCTTCTGTACCGATCTCCAGAG<br>ACCATGATTAAGTGGACACGTGAGAGGGAGTAGGAGCCCAGGCCCTGGGCACCG<br>GGAATGAAGGAGCTGCCT |
