# Supplementary material for: A protein interaction mechanism for suppressing the mechanosensitive Piezo channels
Source: PubMed Central journal article supplement (PMC5702604; doi:10.1038/s41467-017-01712-z), 2017-11-27
Supplement: 41467_2017_1712_MOESM3_ESM.pdf [file 41467_2017_1712_MOESM3_ESM.pdf]

## **Description of Additional Supplementary Files**

File Name: Supplementary Data 1

Description: The proteins identified in the mass spectrometry analysis of the bands near 130kDa.
